# Supplementary material
Source: PubMed Central journal article supplement (PMC2695073)
Supplement: 0811186106_0811186106SI.pdf [file 0811186106_0811186106SI.pdf]

# Supporting Information

Qin et al. 10.1073/pnas.0811186106

## SI Text

**Sequences Used for qRT-PCR.** The forward (F) and reverse (R) primer sequences used for qRT-PCR are as follows: *ascl1a* (*achaete-scute complex-like 1a*): F 5'-CAACTGGTTTTGAGCGTTCG-3', R 5'-GACATCCTCCCAAGCGAGTG-3'; *dlg7* (*discs, large homolog 7*): F 5'-AGGCGAGTCTCCTGTGGATG-3', R 5'-TCCCTCTGTTCTGGGGTGAA-3'; *gpia*: F 5'-TCCAAGGAAACAAGCCAAGC-3', R 5'-TTCCACATCACACCCTGCAC-3'; *hspd1* (*heat shock 60-kDa protein 1*): F 5'-AGGCTCTCTGGTGGTGGAGA-3', R 5'-GCATCTAGCAGTGCCGTCCT-3'; *id3* (*inhibitor of DNA binding 3*): F

5'-TGCCATTAGGATGGATGAATGA-3', R 5'-CGCAGAT-TGCTTTCCCACAC-3'; *mps1* (*monopolar spindle 1*): F 5'-ACTCGCAGGTCGGAAGTCTG-3', R 5'-CCACACGTC-CCCTTTAGCAC-3'; *pcna* (*proliferating cell nuclear antigen*): F 5'-CATGATCTCGTGTGCCAAGG-3', R 5'-TGAGCTG-CACTGGCTCATTC-3'; *pdgfa* (*platelet-derived growth factor a*): F 5'-TTCCCCGAGAGCTGATTGAG-3', R 5'-TGTCCT-TATGGTGGCCTTG-3'; and *six3b* (*sine oculis homeobox homolog 3b*): F 5'-CCAATCCGAGCAAGAAAAGG-3', R 5'-CAGACTGCTTTGGCCCAGTC-3'.

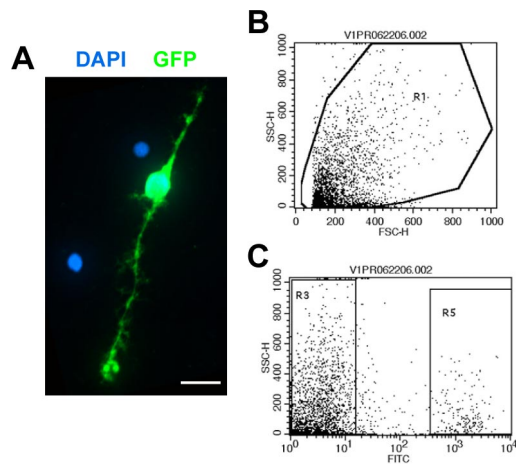

**Fig. S1.** Isolation of GFP<sup>+</sup> Müller glia. (A) Dissociated GFP<sup>+</sup> Müller glial cell (green). Counterstained with DAPI (blue). (B and C) Flow cytometry scatter plots. forward scatter-height (FSC-H); side scatter-height (SSC-H). Dissociated cells from adult *Tg(gfap:GFP)mi2002* zebrafish retinas were gated by forward and side scatters (B), and GFP<sup>+</sup> Müller glia were isolated based on fluorescence in the FITC channel (R5) (C). Our yield of dissociated retinal cells from adult zebrafish (5- to 6-month old) was  $\sim 2.5 \times 10^5$  cells/retina, of which  $\sim 9\%$  were GFP<sup>+</sup> Müller glia. With flow cytometry, we could recover  $\sim 2.1 \times 10^4$  Müller glia/retina, representing an efficiency of  $\sim 84\%$ . (Scale bar: 10  $\mu\text{m}$ .)

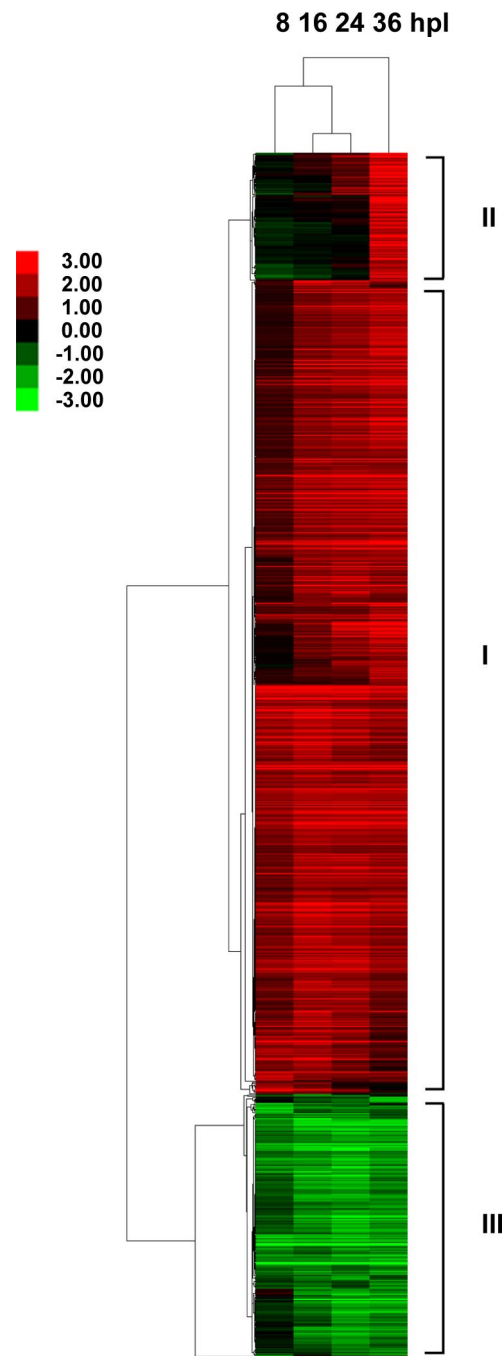

**Fig. S2.** Gene expression profiling of isolated Müller glia from intact and regenerating zebrafish retinas. "Heat map" fold changes of gene expression at 8, 16, 24, and 36 hpi relative to unlesioned retina on a  $\log_2$  scale. Hierarchical clustering analysis revealed 3 major groups: I, II, and III.





33°C 7 dpl **zpr-1**

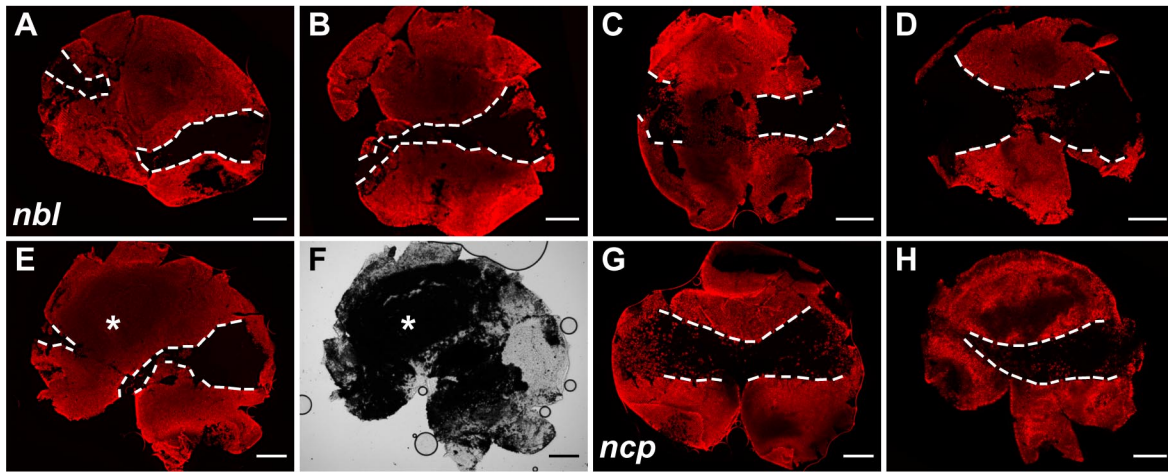

**Fig. S5.** Cone regeneration defect in *nbl* and *ncp* mutants at the restrictive temperature. (A–E, G, and H) Flat-mounted retinas at 7 dpl immunolabeled with *zpr-1* (red). (A–E) One retina from each of 5 *nbl* mutants. (F) Bright-field image of E. (G and H) One retina from each of 2 *ncp* mutants. Dashed lines, light-damaged areas that have few or no *zpr-1*-labeled cones; we cannot determine from these preparations whether the rare scattered cones sometimes observed within the light-damaged areas survived the lesion or have regenerated. Asterisk, attached retinal pigment epithelium. (Scale bars: 300  $\mu\text{m}$ .)

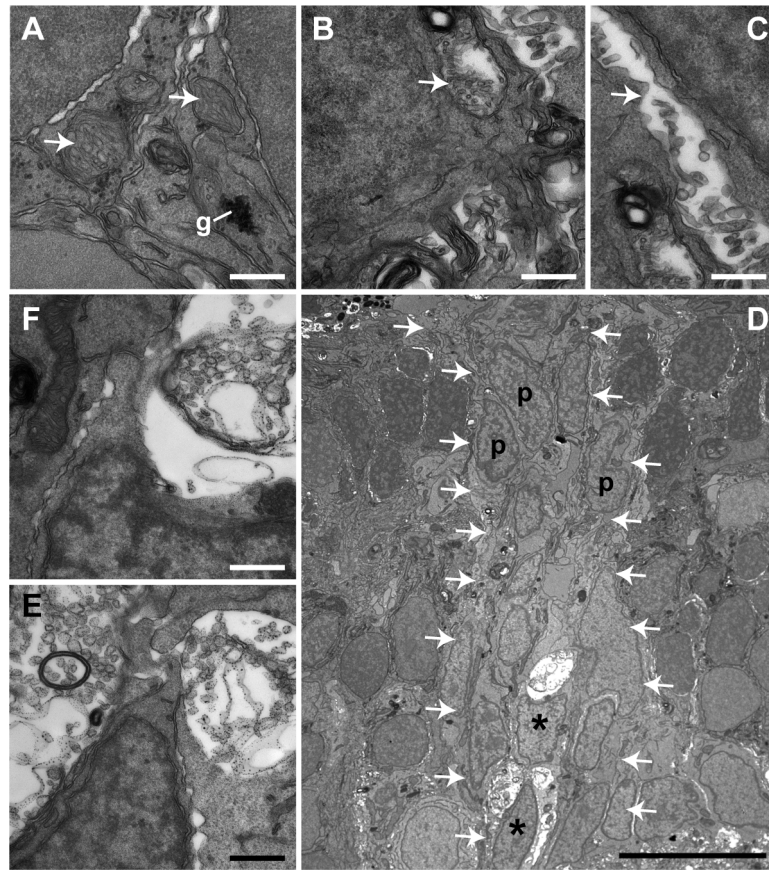

**Fig. S6.** Transmission electron micrographs of mitochondria in injury-activated Müller glia in WT siblings and *nbl* mutants after acute exposure to 33°C. (A–C) High-magnification images of mitochondria in injury-activated Müller glia in retinas at 2 dpl after 8 h of exposure to 33°C. See Fig. 4D for lower magnification images of these sections. (A) Glycogen granules (g) and mitochondria (arrows) in Müller glia in WT. (B and C) Swollen mitochondria with empty matrix in Müller glia of *nbl*. (D) Low-magnification view of a neurogenic cluster (within the arrows) in the inner nuclear layer of *nbl* at 3 dpl after 4 h of exposure to 33°C. Asterisks, Müller glia; p, progenitor. Note that the mitochondrial defect is present only in injury-activated Müller glia but not in the associated neuronal progenitors. (E and F) High-magnification images of mitochondria from the Müller glial cells in D. (Scale bars: 0.5  $\mu\text{m}$  in A–C, E, and F; 10  $\mu\text{m}$  in D.)

**Table S1. Transcriptionally regulated genes common to regenerating retina, fin, and/or heart**

| Gene name                                        | Gene symbol              | Biological process          |
|--------------------------------------------------|--------------------------|-----------------------------|
| <b>Monopolar spindle 1</b>                       | <b><i>mps1 (ttk)</i></b> | Cell cycle                  |
| Decorin                                          | <i>dcn</i>               | Cell signaling              |
| Insulin-like growth factor binding protein 3     | <i>igfbp3</i>            | Cell signaling              |
| Jagged 2                                         | <i>jag2*</i>             | Cell signaling              |
| Kallmann syndr. 1b                               | <i>kal1b</i>             | Cell signaling              |
| Meteorin                                         | <i>metrnl</i>            | Cell signaling              |
| Platelet-derived growth factor $\alpha$          | <i>pdgfa</i>             | Cell signaling              |
| GLI-Kruppel family member GLI2a                  | <i>gli2a</i>             | Cell signaling              |
| TGF- $\beta$ -induced                            | <i>tgfb1</i>             | Cell signaling              |
| TGF- $\beta$ -induced factor homeobox 1          | <i>tgif1</i>             | Cell signaling              |
| Activating transcr. factor 3                     | <i>atf3</i>              | Immunoregulation            |
| Clusterin                                        | <i>clu</i>               | Immunoregulation            |
| LIM domain only 4                                | <i>lmo4</i>              | Immunoregulation            |
| Matrix metalloproteinase 14 beta                 | <i>mmp14b</i>            | Immunoregulation            |
| Similar to complement protein C7-1               | <i>LOC570832*</i>        | Immunoregulation            |
| Matrix metalloproteinase 9                       | <i>mmp9</i>              | Immunoregulation            |
| Suppressor of cytokine signaling 3b              | <i>socs3b</i>            | Immunoregulation            |
| Tissue inhibitor of metalloproteinase 2          | <i>timp2</i>             | Immunoregulation            |
| Cathepsin C                                      | <i>ctsc</i>              | Immunoregulation            |
| Cathepsin B, a                                   | <i>ctsba</i>             | Proteolysis                 |
| Karyopherin alpha 2                              | <i>kpna2</i>             | Protein import into nucleus |
| SRY-box-containing gene 11b                      | <i>sox11b</i>            | Regulation of transcription |
| SRY-box-containing gene 4a                       | <i>sox4a</i>             | Regulation of transcription |
| zic family member 2 (odd-paired-like) b          | <i>zic2b</i>             | Regulation of transcription |
| Nuclear receptor subfamily 1, group D, member 2b | <i>nr1d2b</i>            | Regulation of transcription |
| Calreticulin, like 2                             | <i>calrl2</i>            | Stress response             |
| Heat shock 70-kDa protein 5                      | <i>hspa5</i>             | Stress response             |
| <b>Heat shock 60-kDa protein 1</b>               | <b><i>hspd1</i></b>      | Stress response             |

The genes listed are in the retinal microarray data set reported here and are also found in one or both of the 2 comparison data sets (1, 2). The boldfaced genes correspond to the temperature-sensitive regeneration mutants. All genes except *nr1d2b* are up-regulated at 1 or more sample times.

\*Closely related gene is found in one of the comparison data sets: *jag1a* in fin; *C4-1* and *C4-2* in heart.

1. Schebesta M, Lien CL, Engel FB, Keating MT (2006) Transcriptional profiling of caudal fin regeneration in zebrafish. *Scientific World Journal* 6(Suppl 1):38–54.
2. Lien CL, Schebesta M, Makino S, Weber GJ, Keating MT (2006) Gene expression analysis of zebrafish heart regeneration. *PLoS Biol* 4:1386–1396.
